# Supplementary material for: The Situational Meaning in Life Evaluation (SMILE): Development and Validation Studies
Source: Springer Nature journal article supplement (doi:10.1007/s10902-024-00730-1), 2024-01-23
Supplement: MOESM1 [file 26656560]

**Supplementary materials**

**The Situational Meaning in Life Evaluation (SMILE): development and validation studies**

Michela Zambelli1,2 and Semira Tagliabue3

1Department of Pyschology, Università Cattolica del Sacro Cuore, Milan, IT

2Department of Educational Sciences (DISFOR), Università di Genova, IT

3Department of Pyschology, Università Cattolica del Sacro Cuore, Brescia, IT

Correspondening author: Michela Zambelli, [michela.zambelli@unicatt.it](mailto:michela.zambelli@unicatt.it)

**A.1: The Situational Meaning in Life Evaluation (SMILE)**

Instructions: Looking back on what has happened, and what you have been thinking and doing since the occurrence of [event/situation], we ask you to evaluate how much do you agree with the following statements. Use the following scale to answer considering that 1 corresponds to “strongly disagree” and 7 corresponds to “strongly agree”.

| *Presence - comprehension* | If I look back at my life, I feel I have understood the meaning of the [event/situation] in my life |
| --- | --- |
| *Presence - significance* | Today I can say that my life has value during this [event/situation] |
| *Presence - purpose* | If I think about my future, I have goals for my life that push me to move forward during this [event/situation] |
| *Search - comprehension* | If I look back at my life, I’m trying to understand the meaning of the [event/situation] in my life |
| *Search - significance* | Today I’m trying to understand what gives value to my life during this [event/situation] |
| *Search - purpose* | If I think about my future, I’m searching goals for my life that push me to move forward during this [event/situation] |

**Instructions for the adaptation of the SMILE to different events and situations**

The reference event, situation, or condition **[event/situation]** can be a specific event in the past (e.g., being fired, being diagnosed with cancer), an ongoing non-normative condition (e.g., living during an emergency situation), or a normative condition (e.g., the beginning of school).

The preposition “**during**” can be modified according to the typology of the event/situation considered.

*For example:*

- If I look back at my life, I feel I have understood the meaning of *this emergency situation* in my life.
- Today, I can say that my life *as a cancer patient* has value.
- If I think about my future, I’m searching goals for my life that push me to move forward *during this last year of high-schoo*l.

**A.2: The Situational Meaning in Life Evaluation (SMILE) – daily version**

Instructions: Looking back on what has happened, and what you have been thinking and doing in the past 24 hours, we ask you to evaluate how much do you agree with the following statements.

Use the following scale to answer considering that 1 corresponds to “strongly disagree” and 7 corresponds to “strongly agree”.

| *Presence - comprehension* | Today, I think I comprehend the meaning of my life during this [event/situation] |
| --- | --- |
| *Presence - significance* | Today, I feel that my life has value during this [event/situation] |
| *Presence - purpose* | Today, I think I have goals for my life that push me to move forward during this [event/situation] |
| *Search - comprehension* | Today, I tried to understand the meaning of my life during this [event/situation] |
| *Search - significance* | Today, I tried to understand what gives value to my life during this [event/situation] |
| *Search - purpose* | Today, I searched goals for my life that push me to move forward during this [event/situation] |

**Instructions for the adaptation of the SMILE_daily to different events and situations**

The reference event, situation, or condition **[event/situation]** can be a specific event in the past (e.g., being fired, being diagnosed with cancer), an ongoing non-normative condition (e.g., living during an emergency situation), or a normative condition (e.g., the beginning of school).

The preposition “**during**” can be modified according to the typology of the event/situation considered.

The **temporal reference** is connected to the research questions and design and can be modified accordingly (e.g., today/at present/in the last two hours).

*For example:*

- *Today*, I tried to understand the meaning of my life *since I was diagnosed of cancer.*
- *In this moment*, I feel that my life has value *during this war situation.*

The instructions can be adapted to the research design. For example, in the case of an EMA the instructions might say “Looking back on what has happened, and what you have been thinking and doing *since the last questionnaire you answered*…”

**A.3: The Situational Meaning in Life Evaluation (SMILE) – Italian version**

Istruzioni: Ripensando a ciò che è accaduto e a ciò che hai pensato e fatto dopo il verificarsi di [evento/situazione], ti chiediamo di valutare quanto sei d'accordo con le seguenti affermazioni.

Utilizza la seguente scala per rispondere, considerando che 1 corrisponde a "fortemente in disaccordo" e 7 corrisponde a "fortemente d'accordo".

| *Presence - comprehension* | Se ripenso alla mia vita, sento di aver compreso il significato di [evento/situazione] nella mia vita |
| --- | --- |
| *Presence - significance* | Oggi, posso dire che la mia vita ha valore durante [evento/situazione] |
| *Presence - purpose* | Pensando al mio futuro, ho degli obiettivi di vita che mi spingono ad andare avanti durante [event/situation] |
| *Search - comprehension* | Se ripenso alla mia vita, sto cercando di comprendere il significato di [event/situation] nella mia vita |
| *Search - significance* | Oggi, sto cercando di capire cosa dà valore alla mia vita durante [event/situation] |
| *Search - purpose* | Pensando al mio futuro, sto cercando degli obiettivi di vita che mi spingano ad andare avanti durante [event/situation] |

**A.2: The Situational Meaning in Life Evaluation (SMILE) – daily version – Italian version**

Istruzioni: Ripensando a ciò che è accaduto e a ciò che hai pensato e fatto nelle ultime 24 ore, ti chiediamo di valutare quanto sei d'accordo con le seguenti affermazioni.

Utilizza la seguente scala per rispondere, considerando che 1 corrisponde a "fortemente in disaccordo" e 7 corrisponde a "fortemente d'accordo".

| *Presence - comprehension* | Oggi, sento di comprendere il significato della mia vita durante [evento/situazione] |
| --- | --- |
| *Presence - significance* | Oggi, sento che la mia vita ha valore durante [evento/situazione] |
| *Presence - purpose* | Oggi, sento di avere degli obiettivi di vita che mi spingono ad andare avanti durante [event/situation] |
| *Search - comprehension* | Oggi, ho cercato di comprendere il significato della mia vita durante [event/situation] |
| *Search - significance* | Oggi, ho cercato di capire cosa dà valore alla mia vita durante [event/situation] |
| *Search - purpose* | Oggi, ho cercato degli obiettivi di vita che mi spingano ad andare avanti durante [event/situation] |

**Table S1**

*Descriptive statistics for the study 2 and study 3*

|  | Descriptive statistics | |
| --- | --- | --- |
| Socio-demographic variable | Study 2 (N = 3035) | Study 3 (N = 278) |
| Age (Mean, SD) | 48.3 (14.03)  EA: 28.8 (4.64)  A: 48.7 (7.86)  LA: 70.1 (4.51) | 24.3 (3.05) |
| Females (%, N) | 51.6% (1559)  EA: 51.7% (342)  A: 52.5% (1023)  LA: 45.8% (194) | 76.5% (153) |
| Involved in a romantic relationship (%, N) | 73.9% (2242)  EA: 66.1% (439)  A: 76.7% (1494)  LA: 72.9% (309) | 64% (174) |
| Marital status (%, N)  Unmarried/single  Married  Divorced/separated  Widowed | 36.6% (1110)  55.2% (1674)  6% (181)  2.3% (70) | 95.3% (261)  4.7% (7)  -  - |
| Educational level (%, N)  Primary school diploma  Middle school diploma  High school diploma  Bachelor/Master/Post graduate degree | 0.9% (28)  10.9% (332)  55.6% (1687)  32.5% (986) | -  1.1% (2)  37.4% (104)  61.5% (171) |
| *Note.* EA=Emerging and young adults (18-35); A=Adults (36-64); LA=Late adults (65-91) | | |

| **Table S2**  *Standardized factor loadings for Model 3 in study 2 (N = 2831)* | | |
| --- | --- | --- |
| Item | Factor 1 | Factor 2 |
|  | Presence of meaning | Search for meaning |
| SMILE_PC | .717 |  |
| SMILE_PP | .781 |  |
| SMILE_PM | .878 |  |
| SMILE_SC |  | .723 |
| SMILE_SP |  | .770 |
| SMILE_SM |  | .838 |
| McDonald’s omega | Ω = .83 | Ω = .82 |
| *Note.* SMILE_PC: presence of comprehension; SMILE_PP: presence of purpose; SMILE_PM: presence of significance; SMILE_SC: search of comprehension; SMILE_SP: search of purpose; SMILE_SM: search of significance. | | |

| **Table S3**  *Standardized factor loadings for Model 4 in study 2 (N = 2831)* | | | | | |
| --- | --- | --- | --- | --- | --- |
| Items | Structure 1 | | Structure 2 | | |
|  | Factor 1 | Factor 2 | Factor 1 | Factor 2 | Factor 3 |
|  | Presence of meaning | Search for meaning | Comprehension | Significance | Purpose |
| SMILE_PC | .578 |  | .497 |  |  |
| SMILE_PM | .837 |  |  | .291 |  |
| SMILE_PP | .749 |  |  |  | .324 |
| SMILE_SC |  | .393 | .703* |  |  |
| SMILE_SM |  | .474 |  | .726* |  |
| SMILE_SP |  | .413 |  |  | .745* |
| McDonald’s omega | Ω = .83 | Ω = .82 |  |  |  |
| *Note.* * Factor loadings fixed to 1 to avoid convergence problems.  SMILE_PC: presence of comprehension; SMILE_PP: presence of purpose; SMILE_PM: presence of significance; SMILE_SC: search of comprehension; SMILE_SP: search of purpose; SMILE_SM: search of significance. | | | | | |

| **Table S4**  *Multi-Group Measurement Invariance of the SMILE in study 2 (N = 2831)* | | | | | | | | | | | |
| --- | --- | --- | --- | --- | --- | --- | --- | --- | --- | --- | --- |
|  | *χ2* | *df* | p-value | CFI | RMSEA [CI] | SRMR |  |  | p-value |  |  |
| *Model 3 – two-factor structure with correlated residuals* | | | | | | | | | | | |
| Gender (male; female) | | | | | | | | | | | |
| Configural invariance | 118.9 | 10 | <.001 | .99 | .09 [.077-.101] | .03 |  |  |  |  |  |
| Metric invariance | 125.0 | 16 | <.001 | .99 | .07 [.059-.081] | .04 | 6.17 | 6 | .404 | .000 | -.018 |
| Scalar invariance | 152.8 | 22 | <.001 | .98 | .06 [.055-.075] | .04 | 27.77 | 6 | <.001 | -.003 | -.005 |
| Strict invariance | 182.2 | 28 | <.001 | .98 | .06 [.054-.071] | .05 | 29.38 | 6 | <.001 | -.002 | -.002 |
| Structural invariance | 183.5 | 29 | <.001 | .98 | .06 [.053-.070] | .05 | 1.35 | 1 | .245 | .000 | -.001 |
| Age (18-35 years; 36-64 years; 65-91 years) | | | | | | | | | | | |
| Configural invariance | 121.5 | 15 | <.001 | .99 | .09 [.073-.101] | .02 |  |  |  |  |  |
| Metric invariance | 151.8 | 27 | <.001 | .98 | .07 [.059-.081] | .07 | 30.34 | 12 | .002 | -.002 | -.017 |
| Scalar invariance | 195.1 | 39 | <.001 | .98 | .06 [.056-.074] | .09 | 43.27 | 12 | <.001 | -.002 | -.005 |
| Strict invariance | 280.6 | 51 | <.001 | .97 | .07 [.061-.077] | .12 | 85.47 | 12 | <.001 | -.009 | .004 |
| Structural invariance | 321.8 | 53 | <.001 | .97 | .07 [.066-.081] | .12 | 41.26 | 2 | <.001 | -.002 | -.002 |
| *Note.* : Chi-square test of model fit; *df*: degrees of freedom; RMSEA [CI]: root mean square error of approximation [90 percent confidence interval]; CFI: comparative fit index; SRMR: standardized root mean square residual*.* | | | | | | | | | | | |

| **Table S5**  *Factor loadings for the two-factor model with correlated residuals in study 3 (N = 278)* | | |
| --- | --- | --- |
| Item | Factor 1 | Factor 2 |
|  | Presence of meaning | Search for meaning |
| SMILE_PC | .760 |  |
| SMILE_PP | .819 |  |
| SMILE_PM | .932 |  |
| SMILE_SC |  | .786 |
| SMILE_SP |  | .743 |
| SMILE_SM |  | .868 |
| McDonald’s omega | Ω = .87 | Ω = .84 |
| *Note.* SMILE_PC: presence of comprehension; SMILE_PP: presence of purpose; SMILE_PM: presence of significance; SMILE_SC: search of comprehension; SMILE_SP: search of purpose; SMILE_SM: search of significance. | | |

**Incremental validity evidence of SMILE items on criterion variables**

For exploratory purposes we tested the incremental validity of the six SMILE items separately, in order to investigate whether the separate components of comprehension (presence and search), purpose (presence and search), and mattering (presence and search) were able to explain additional variance of the outcomes beyond MLQ indicators. To answer this aim, we conducted a hierarchical regression models for each of the criterion variables (satisfaction with life, future anxiety, hope agency and hope pathway) including in step 1 presence and search for meaning from the MLQ, and in step 2 the two items measuring presence and search for each content dimension separately (to avoid multicollinearity issues between items belonging to the presence and search dimensions), for a total of 12 models.

Seven of the models yield significant results (Table S6-S8). Specifically, presence of significance resulted to be a significant predictor in each model, contributing to the explanation of additional variance of outcome variables beyond the MLQ indicators. Presence of comprehension was a significant predictor of future anxiety, explaining additional variance beyond MLQ indicators. Presence of purpose resulted to be a significant predictor of both facets of hope (agency and pathway), explaining additional variance beyond MLQ indicators.

Overall, these results add evidence of incremental validity of the SMILE measure over the MLQ, suggesting that the SMILE measure covers a broader set of aspects of the meaning in life construct and proving its usefulness in predicting well-being and future perspectives in the emerging and young adult population. According to these results, single items of the SMILE measure can be considered as unique and independent components of the meaning in life construct and be used to investigate the role of each sub-component in the meaning-making process.

| **Table S6**  *Hierarchical linear regression to test incremental validity of the SMILE items on Satisfaction with life (study 3, N = 278)* | | | | | |
| --- | --- | --- | --- | --- | --- |
| Model S1 - comprehension | | Model S2 - significance | | Model S2 - purpose | |
|  | stand.  |  | stand.  |  | stand.  |
| Block 1 – MLQ |  |  |  |  |  |
| MLQ_P | .70** |  | .70** |  | .70** |
| MLQ_S | -.12** |  | -.12** |  | -.12** |
| Block 2 – F (R2) | .05 (.00) | Block 2 – F (R2) | 5.4** (.02) | Block 2 – F (R2) | 2.8 (.01) |
| MLQ_P |  | MLQ_P | .53** | MLQ_P |  |
| MLQ_S |  | MLQ_S | -.16** | MLQ_S |  |
| SMILE_PC |  | SMILE_PS | .21** | SMILE_PP |  |
| SMILE_SC |  | SMILE_SS | .03 | SMILE_SP |  |
| *Note.* *p < .05; **p < .01. MLQ_P: presence of meaning’s factor score; MLQ_S: search for meaning’s factor score; SMILE_PC: presence of comprehension; SMILE_SC: search for comprehension; SMILE_PS: presence of significance; SMILE_SS: search for significance; SMILE_PP: presence of purpose; SMILE_SP: search for purpose. | | | | | |

| **Table S7**  *Hierarchical linear regression to test incremental validity of the SMILE items on Future Anxiety (study 3, N = 278)* | | | | | |
| --- | --- | --- | --- | --- | --- |
| Model D1 - comprehension | | Model D2 - significance | | Model D2 - purpose | |
|  | stand.  |  | stand.  |  | stand.  |
| Block 1 |  |  |  |  |  |
| MLQ_P | -.50** |  | -.50** |  | -.50** |
| MLQ_S | .30** |  | .30** |  | .30** |
| Block 2 – F (R2) | 3.03* (.01) | Block 2 – F (R2) | 6.2** (.03) | Block 2 – F (R2) | .75 (.00) |
| MLQ_P | -.39** | MLQ_P | -.31** | MLQ_P |  |
| MLQ_S | .28** | MLQ_S | .30** | MLQ_S |  |
| SMILE_PC | -.17* | SMILE_PS | -.26** | SMILE_PP |  |
| SMILE_SC | .06 | SMILE_SS | .04 | SMILE_SP |  |
| *Note.* *p < .05; **p < .01. MLQ_P: presence of meaning’s factor score; MLQ_S: search for meaning’s factor score; SMILE_PC: presence of comprehension; SMILE_SC: search for comprehension; SMILE_PS: presence of significance; SMILE_SS: search for significance; SMILE_PP: presence of purpose; SMILE_SP: search for purpose. | | | | | |

| **Table S8**  *Hierarchical linear regression to test incremental validity of the SMILE items on Hope Agency and Pathway (study 3, N = 278)* | | | | | |
| --- | --- | --- | --- | --- | --- |
| Model A1 - comprehension | | Model A2 - significance | | Model A2 - purpose | |
|  | stand.  |  | stand.  |  | stand.  |
| Block 1 |  |  |  |  |  |
| MLQ_P | .68** |  | .68** |  | .68** |
| MLQ_S | -.01 |  | -.01 |  | -.01 |
| Block 2 – F (R2) | 1.24 (.00) | Block 2 – F (R2) | 3.64 (.01) | Block 2 – F (R2) | 8.57** (.03) |
| MLQ_P |  | MLQ_P | .54* | MLQ_P | .48** |
| MLQ_S |  | MLQ_S | -.02 | MLQ_S | -.01 |
| SMILE_PC |  | SMILE_PS | .19* | SMILE_PP | .27** |
| SMILE_SC |  | SMILE_SS | -.001 | SMILE_SP | -.04 |
| Model P1 - comprehension | | Model P2 - significance | | Model P2 - purpose | |
| Block 1 |  |  |  |  |  |
| MLQ_P | .63** |  | .63** |  | .63** |
| MLQ_S | -.001 |  | -.001 |  | -.001 |
| Block 2 – F (R2) | 2.19 (.01) | Block 2 – F (R2) | 3.20* (.01) | Block 2 – F (R2) | 7.76** (.03) |
| MLQ_P |  | MLQ_P | .49** | MLQ_P | .42** |
| MLQ_S |  | MLQ_S | .005 | MLQ_S | .02 |
| SMILE_PC |  | SMILE_PS | .18** | SMILE_PP | .28** |
| SMILE_SC |  | SMILE_SS | -.04 | SMILE_SP | -.08 |
| *Note.* *p < .05; **p < .01. Model A1-A4: Hope Agency; Model P1-P3: Hope Pathway; MLQ_P: presence of meaning’s factor score; MLQ_S: search for meaning’s factor score; SMILE_PC: presence of comprehension; SMILE_SC: search for comprehension; SMILE_PS: presence of significance; SMILE_SS: search for significance; SMILE_PP: presence of purpose; SMILE_SP: search for purpose. | | | | | |


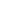

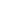

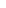

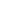
**Fig. S1**

Theory-based factorial structure tested for the SMILE scale


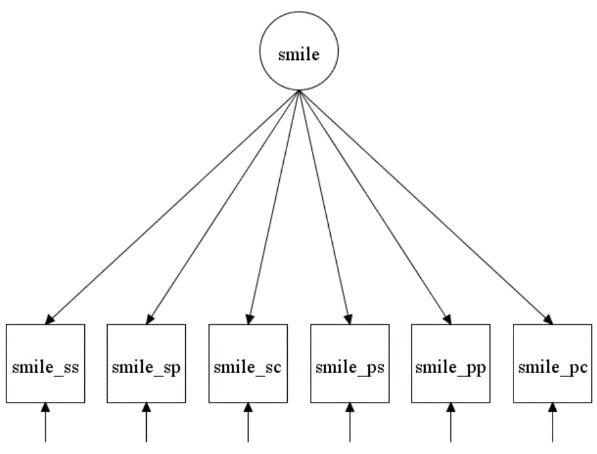

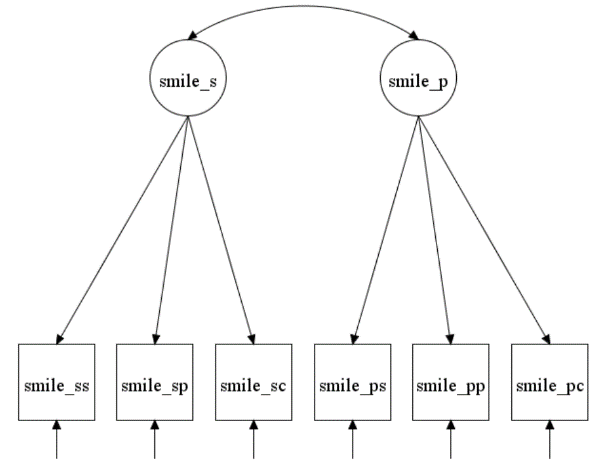


**Model 2**

**Model 1**

**Model 1**


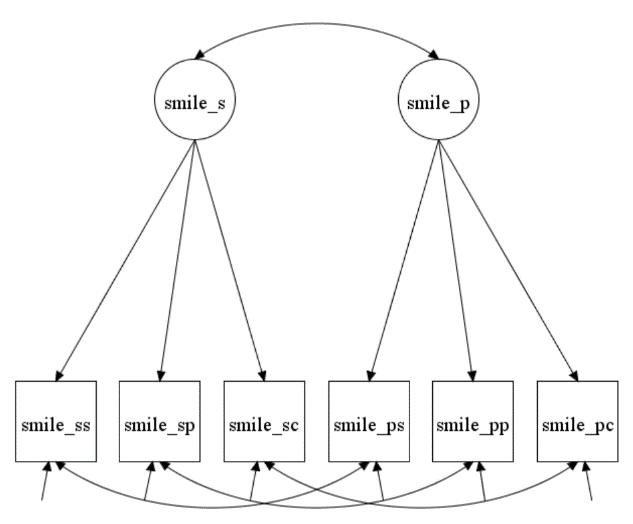

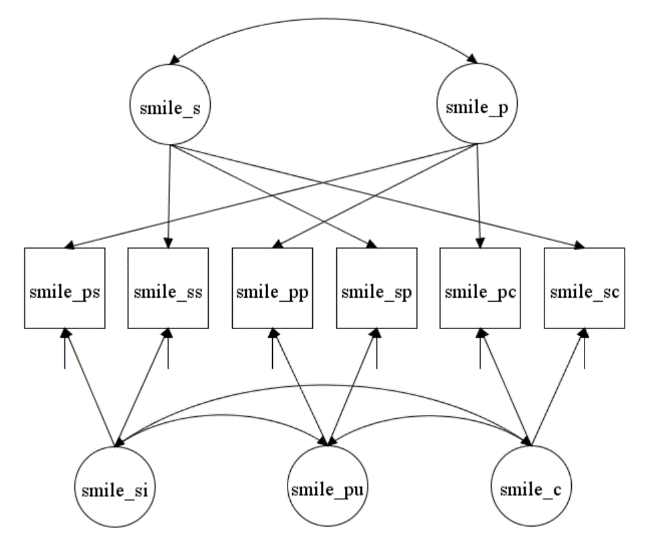


**Model 4**

**Model 3**

Note. Model 1: one-factor structure; Model 2: two-factor structure with orthogonal residuals; Model 3: two-factor structure with correlated residuals; Model 4: bi-factor structure. Squares represent observed indicators, where the desinence _s represents search for meaning; _p represents presence of meaning; and the final letters refers to the content-dimension (s: significance; c: comprehension; p: purpose). Circles represent latent factors (smile_p: presence of meaning; smile_s: search for meaning; smile_si: significance; smile_pu: purpose; smile_c: comprehension.
